# Supplementary material for: Synthesis and evolution of physicochemical properties of new pharmaceutically active ionic liquids – tetracainium salicylate and tetracainium ibuprofenate
Source: Royal Society of Chemistry journal article supplement (doi:10.1039/d2ra04711j), 2022-01-01
Supplement: d2ra04711j1.pdf [file d2ra04711j1.pdf]

## Electronic supplementary information

### **Synthesis and evolution of physicochemical properties of new pharmaceutically active ionic liquids – tetracainium salicylate and tetracainium ibuprofenate**

Maksim Rapačić<sup>a</sup>, Jovana Panić<sup>a\*</sup>, Branislava Teofilović<sup>b</sup>, Nevena Grujić-Letić<sup>b</sup>, Slobodan  
Gadžurić<sup>a</sup>, Milan Vraneš<sup>a</sup>

<sup>a</sup>Faculty of Sciences, Department of Chemistry, Biochemistry and Environmental Protection,  
University of Novi Sad, Trg Dositeja Obradovića 3, 21000 Novi Sad, Serbia

<sup>b</sup>Faculty of Medicine, University of Novi Sad, Hajduk Veljkova 3, 21000 Novi Sad, Serbia

---

\*Corresponding Author: Tel: +381 21 485 2751; Fax: +381 21 454 065; E-mail: jovanap@dh.uns.ac.rs

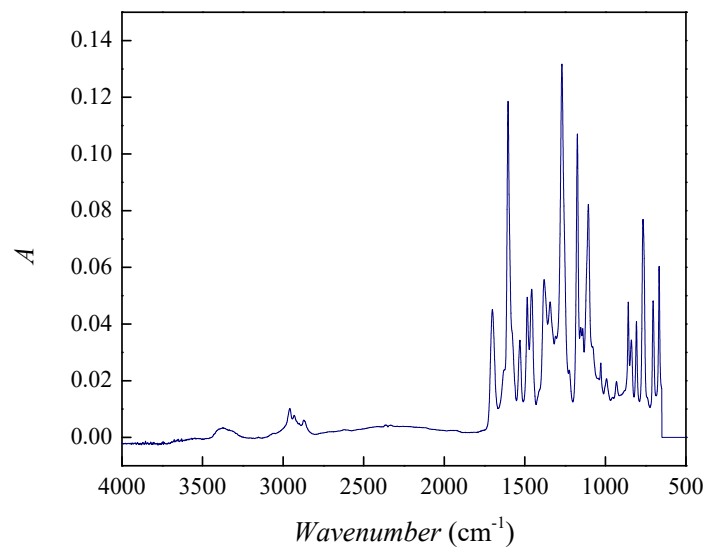

a)

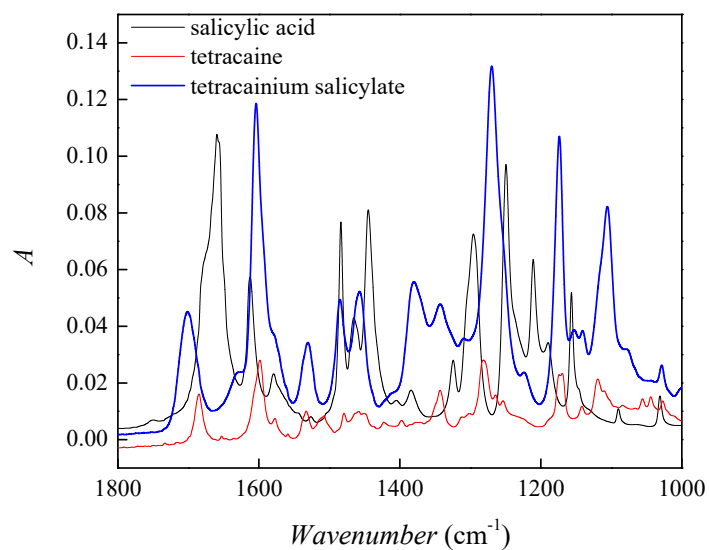

b)

**Figure S1.** a) IR spectrum of tetracainium salicylate; b) the IR spectra in region of 1800–1000  $\text{cm}^{-1}$  for tetracainium salicylate, salicylic acid, and tetracaine.

IR (neat) 3500- 2700 N-H stretch and O-H stretch; 2957.86 C-H stretch; 1701.14 C=O stretch; 1603.87 conjugated C=O stretch and N-H bend; 1484.94 and 1456.94 CC stretch; 1380.06 OH in-plane bend; 1269.90 C-O stretch and C-N stretch; 1173.75 C=O stretch; 766.45 stretching in the plane of the aromatic ring.

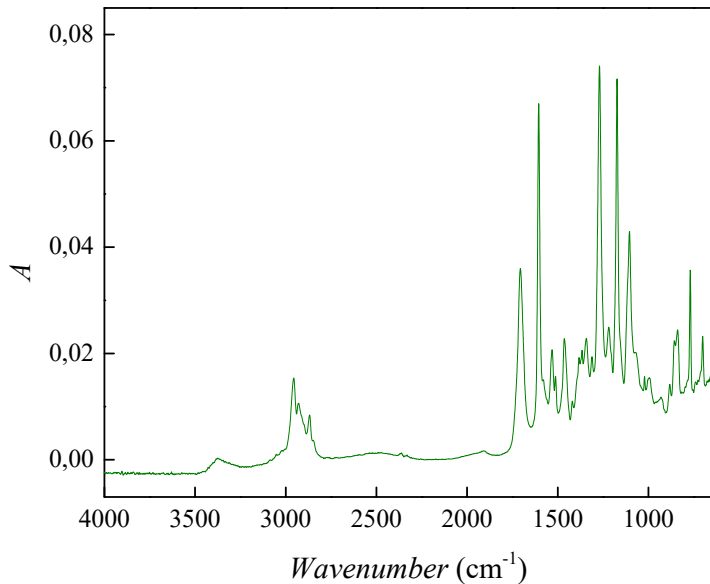

a)

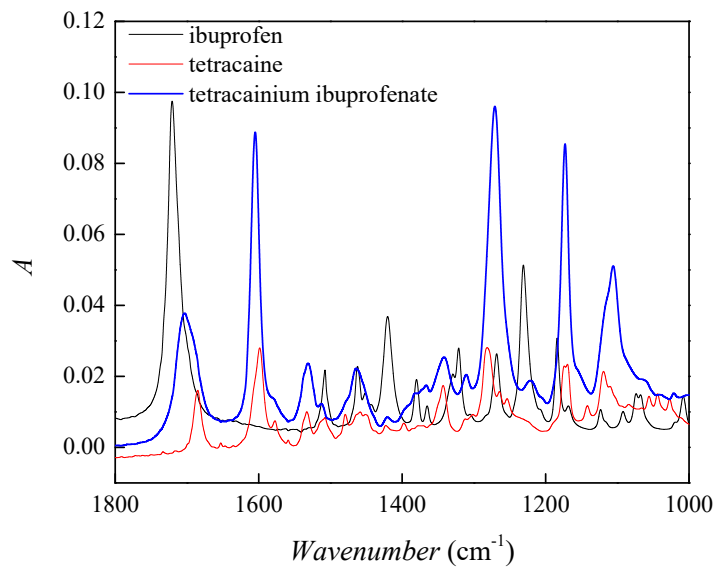

b)

**Figure S2.** a) IR spectrum of tetracainium ibuprofenate; b) the IR spectra in region of 1800–1000  $\text{cm}^{-1}$  for tetracainium ibuprofenate, ibuprofen, and tetracaine.

IR (neat) 3500- 2700 N-H stretch; 2956.59 C-H stretch; 1703.27 C=O stretch; 1604.80 conjugated C=O stretch and N-H bend; 1267.19 C-O and C-N stretch; 1172.85 C=O stretch; 769.82 stretching in the plane of the aromatic ring.

TETRASAL DMSO 11.05.2022.

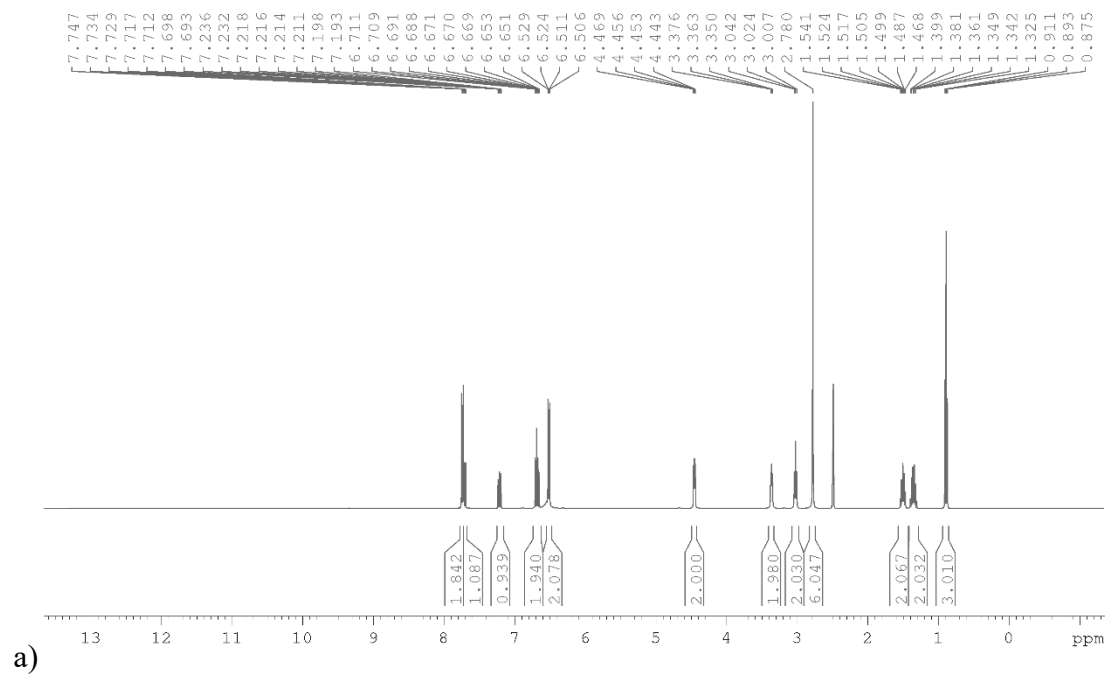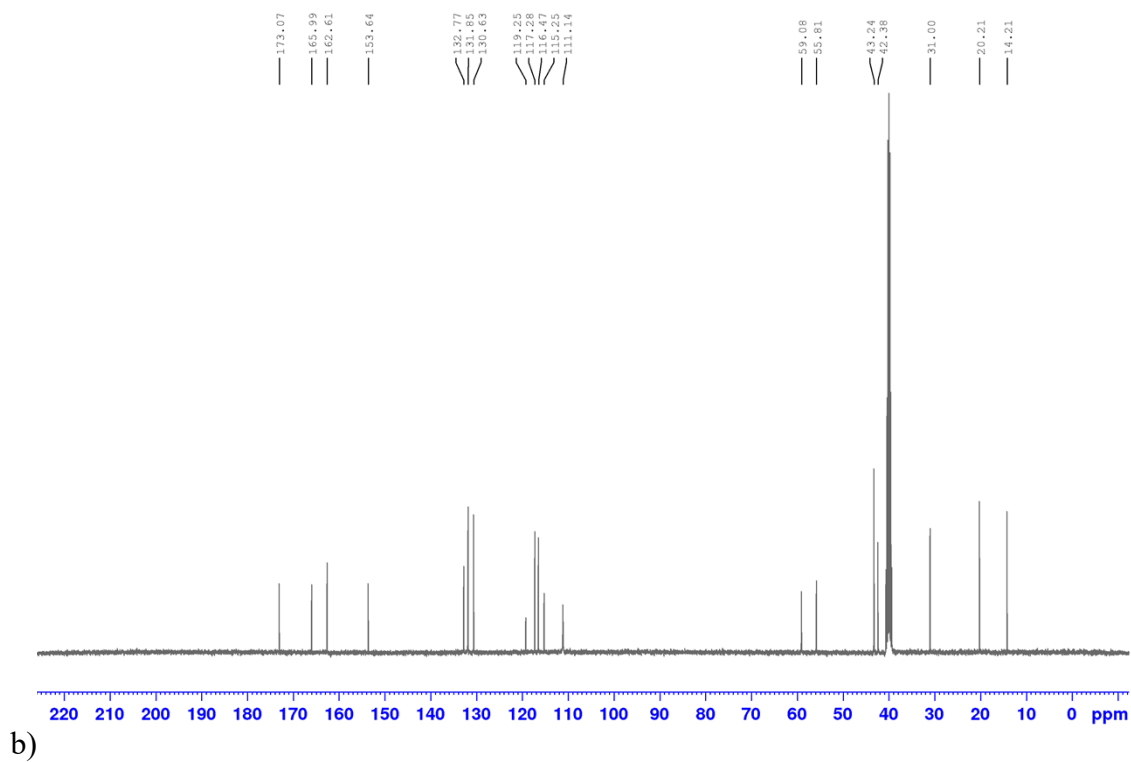

Figure S3. a)  $^1\text{H}$ , and b)  $^{13}\text{C}$  NMR for synthesized tetracainium salicylate.

$^1\text{H}$  NMR (400 MHz, DMSO-d<sub>6</sub>, ppm): 0.89 (t, 3H); 1.36 (m, 2H); 1.51 (m, 2H); 2.78 (s, 6H); 3.02 (t, 2H); 3.36 (t, 2H); 4.46 (t, 2H); 6.52 (d, 2H); 6.69 (m, 2H); 7.22 (m, 1H); 7.71 (dd, 1H); 7.74 (d, 2H).

$^{13}\text{C}$  NMR (101 MHz, DMSO-d<sub>6</sub>, ppm): 14.21; 20.21; 31.00; 42.38; 43.24; 55.81; 59.08; 111.14; 115.25; 116.47; 117.27; 119.25; 130.63; 131.85; 132.77; 153.61; 162.61; 165.99; 173.07.

TETRAIBP DMSO 11.05.2022.

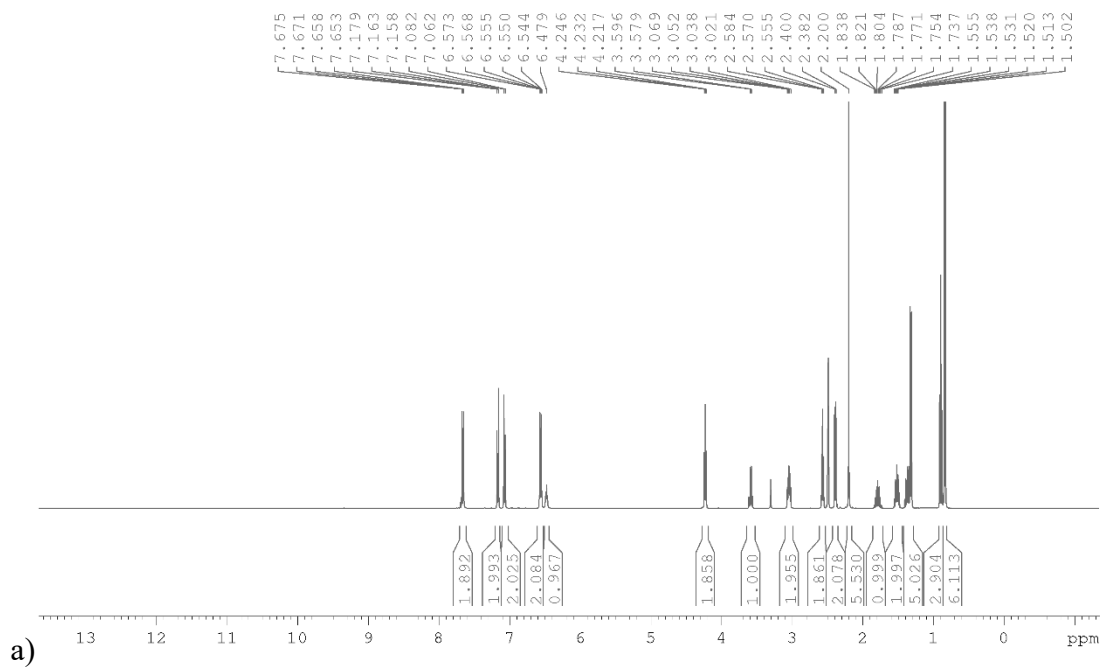

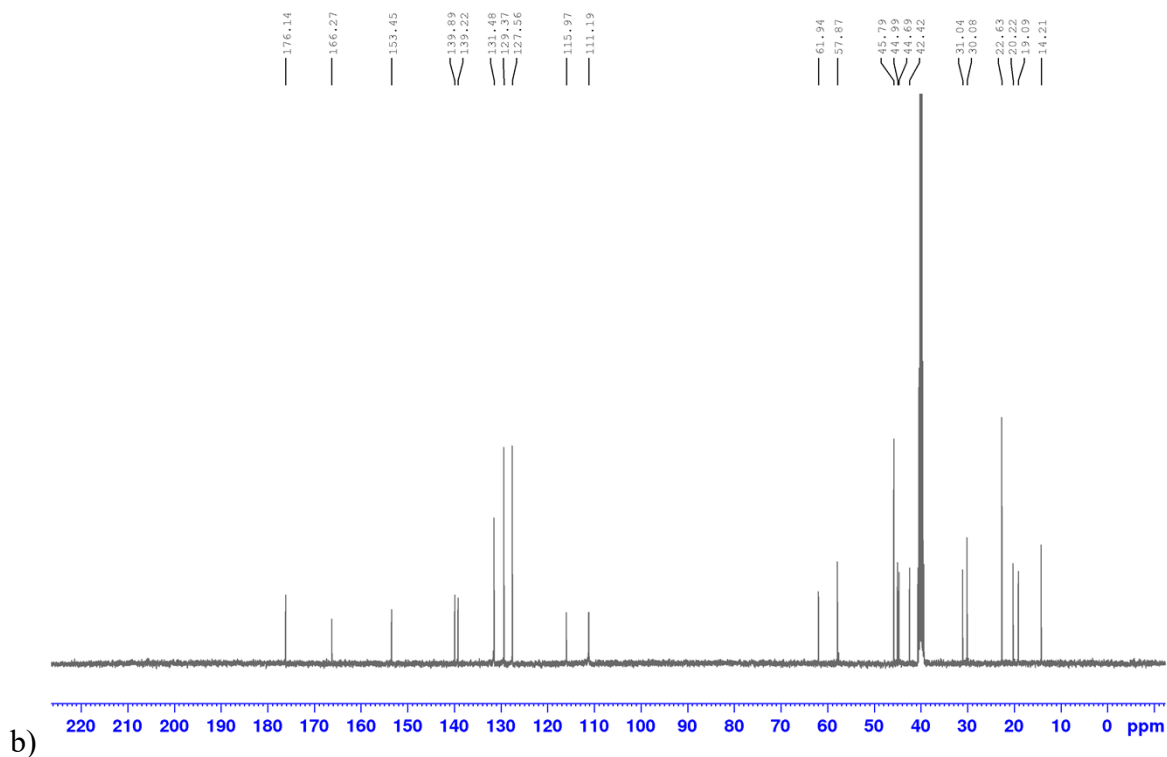

**Figure S4.** a)  $^1\text{H}$ , and b)  $^{13}\text{C}$  NMR for synthesized tetracainium ibuprofenate.

$^1\text{H}$  NMR (400 MHz, DMSO- $d_6$ , ppm): 0.84 (d, 6H); 0.90 (t, 3H); 1.32 (d, 3H); 1.37 (m, 2H); 1.52 (m, 2H); 1.79 (m, 1H); 2.19 (s, 6H); 2.38 (d, 2H); 2.57 (t, 2H); 3.04 (q, 2H); 3.59 (q, 1H); 4.23 (t, 2H); 6.48 (t, 1H); 6.56 (d, 2H); 7.07 (d, 2H); 7.17 (d, 2H); 7.67 (d, 2H).

$^{13}\text{C}$  NMR (101 MHz, DMSO- $d_6$ , ppm): 14.21; 19.09; 20.22; 22.63; 30.08; 31.04; 42.42; 44.69; 44.99; 45.79; 57.87; 61.94; 111.19; 115.97; 127.56; 129.37; 131.48; 139.89; 153.45; 166.27; 176.15.

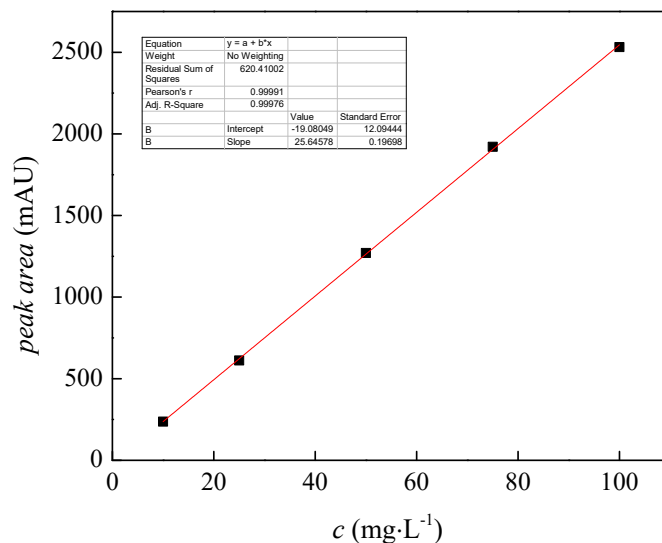

**Figure S5.** The calibration curve (plot of peak areas versus concentrations of tetracaine) used for the estimation purity of ionic liquids.

**Table S1.** Experimental values of densities ( $d$ ), and thermal expansion coefficients ( $\alpha_p$ ) for [Tet][Sal] and [Tet][Ibp], at different temperatures.

| $T$ (K) | $d$ ( $\text{g}\cdot\text{cm}^{-3}$ ) |            | $\alpha_p \cdot 10^4$ ( $\text{K}^{-1}$ ) |            |
|---------|---------------------------------------|------------|-------------------------------------------|------------|
|         | [Tet][Sal]                            | [Tet][Ibp] | [Tet][Sal]                                | [Tet][Ibp] |
| 293.15  | /                                     | 1.04389    | /                                         | 8.04       |
| 298.15  | /                                     | 1.04006    | /                                         | 8.07       |
| 303.15  | /                                     | 1.03611    | /                                         | 8.10       |
| 308.15  | 1.14607                               | 1.03198    | 6.89                                      | 8.13       |
| 313.15  | 1.14235                               | 1.02750    | 6.91                                      | 8.17       |
| 318.15  | 1.13875                               | 1.02344    | 6.93                                      | 8.20       |
| 323.15  | 1.13516                               | 1.01928    | 6.96                                      | 8.23       |
| 328.15  | 1.13134                               | 1.01509    | 6.98                                      | 8.27       |
| 333.15  | 1.12725                               | 1.01089    | 7.01                                      | 8.30       |
| 338.15  | 1.12303                               | 1.00668    | 7.03                                      | 8.34       |
| 343.15  | 1.11879                               | 1.00245    | 7.06                                      | 8.37       |
| 348.15  | 1.11477                               | 0.99811    | 7.08                                      | 8.41       |

|        |         |         |      |      |
|--------|---------|---------|------|------|
| 353.15 | 1.11072 | 0.99360 | 7.11 | 8.45 |
|--------|---------|---------|------|------|

**Table S2.** Experimental values of viscosities ( $\eta$ ) for [Tet][Sal] and [Tet][Ibp], at different temperatures.

| $T$ (K) | $\eta$ (Pa·s) |            |
|---------|---------------|------------|
|         | [Tet][Sal]    | [Tet][Ibp] |
| 293.15  | 30655         | 40.430     |
| 298.15  | 8038.1        | 17.298     |
| 303.15  | 2411.5        | 8.4783     |
| 308.15  | 826.51        | 4.2498     |
| 313.15  | 295.17        | 2.2630     |
| 318.15  | 90.666        | 1.2672     |
| 323.15  | 38.291        | 0.7433     |
| 328.15  | 15.643        | 0.4835     |
| 333.15  | 7.6784        | 0.3120     |
| 338.15  | 4.0743        | 0.2100     |
| 343.15  | 2.2461        | 0.1455     |
| 348.15  | 1.3189        | 0.1028     |
| 353.15  | 0.8020        | 0.0666     |

**Table S3.** Experimental value of electrical conductivities ( $\kappa$ ), and calculated molar conductivities ( $\lambda_m$ ) for [Tet][Sal] and [Tet][Ibp], at different temperatures.

| $T$ (K) | $\kappa$ ( $\mu\text{S}\cdot\text{cm}^{-1}$ ) |            | $\lambda_m \cdot 10^4$ ( $\text{S}\cdot\text{cm}^2\cdot\text{mol}^{-1}$ ) |            |
|---------|-----------------------------------------------|------------|---------------------------------------------------------------------------|------------|
|         | [Tet][Sal]                                    | [Tet][Ibp] | [Tet][Sal]                                                                | [Tet][Ibp] |
| 318.15  | 1.90                                          | 1.89       | 6.73                                                                      | 8.69       |
| 323.15  | 2.63                                          | 2.33       | 9.32                                                                      | 10.7       |
| 328.15  | 3.81                                          | 2.98       | 13.5                                                                      | 13.8       |
| 333.15  | 6.25                                          | 3.59       | 22.3                                                                      | 16.7       |
| 338.15  | 8.21                                          | 4.28       | 29.4                                                                      | 20.0       |
| 343.15  | 12.3                                          | 5.09       | 44.1                                                                      | 23.9       |
| 348.15  | 17.4                                          | 6.11       | 62.7                                                                      | 28.8       |
| 353.15  | 25.7                                          | 7.20       | 93.1                                                                      | 34.1       |
